# Supplementary material for: Laser-processed antiadhesive bionic combs for handling nanofibers inspired by nanostructures on the legs of cribellate spiders
Source: publisher site journal article supplement (doi:10.3762/bjnano.13.105), 2022-11-07
Supplement: Additional file 1 [file 2190-4286-13-105-S1.pdf]

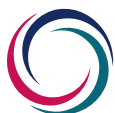

## Supporting Information

for

### **Laser-processed antiadhesive bionic combs for handling nanofibers inspired by nanostructures on the legs of cribellate spiders**

Sebastian Lifka, Kristóf Harsányi, Erich Baumgartner, Lukas Pichler, Dariya Baiko, Karsten Wasmuth, Johannes Heitz, Marco Meyer, Anna-Christin Joel, Jörn Bonse and Werner Baumgartner

*Beilstein J. Nanotechnol.* **2022**, *13*, 1268–1283. doi:10.3762/bjnano.13.105

## Additional experimental data

**Table S1:** Morphological data of the nanoripples found on the calamistrum of four distantly related cribellate spiders.

| <b>Species</b>               | <b>Periodicity (nm)</b> | <b>Height (nm)</b> |
|------------------------------|-------------------------|--------------------|
| <i>Amaurobius similis</i>    | 222 ± 8<br>(n = 3)      | 210<br>(n = 1)     |
| <i>Hickmania troglodytes</i> | 205 ± 13<br>(n = 3)     |                    |
| <i>Jamberoo johnnoblei</i>   | 233<br>(n = 1)          |                    |
| <i>Uloborus plumipes</i>     | 216 ± 10<br>(n = 3)     | 200 <sup>a</sup>   |

<sup>a</sup>Data taken from [1].

**Table S2:** Statistical analysis of the presented measurement results (Two-tail *t*-test assuming equal variances, confidence level 95%).

| <b>Sample 1</b>   | <b>Sample 2</b>   | <b>P value</b> | <b>Statistically significant</b> |
|-------------------|-------------------|----------------|----------------------------------|
| Al alloy polished | Al alloy LIPSS    | 0.91           | No                               |
| Steel polished    | Steel LIPSS       | 8.85e-7        | Yes                              |
| Ti alloy polished | Ti alloy LIPSS    | 3.14e-4        | Yes                              |
| Ti alloy faced    | Ti alloy LIPSS    | 2.49e-5        | Yes                              |
| Ti alloy 240      | Ti alloy LIPSS    | 6.66e-5        | Yes                              |
| Ti alloy 80       | Ti alloy LIPSS    | 4.76e-7        | Yes                              |
| Ti alloy faced    | Ti alloy polished | 0.25           | No                               |
| Ti alloy 240      | Ti alloy polished | 0.01           | Yes                              |
| Ti alloy 80       | Ti alloy polished | 8.09e-4        | Yes                              |

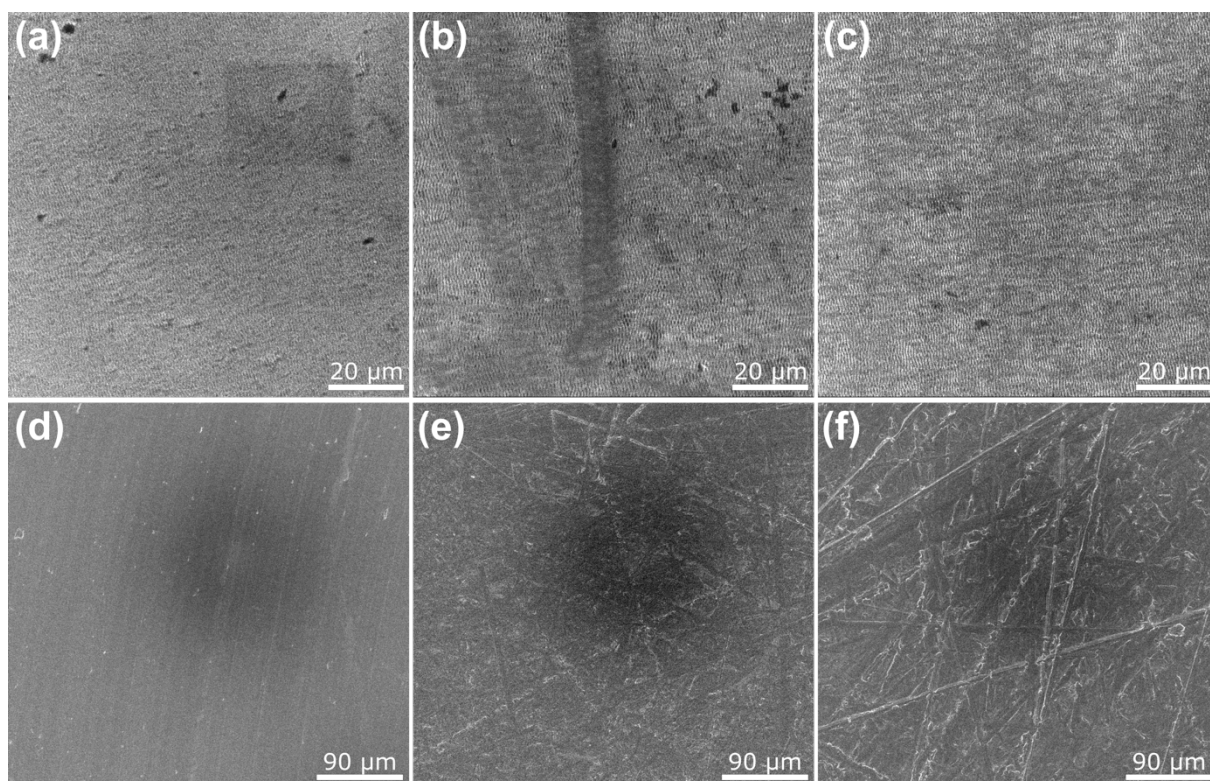

**Figure S1:** Scanning electron micrographs of the surface of the investigated samples. (a) Al alloy LIPSS-covered; (b) steel LIPSS-covered; (c) Ti alloy LIPSS-covered; (d) Ti alloy faced; (e) Ti alloy 240; (f) Ti alloy 80.

## References

1. Joel, A.-C.; Meyer, M.; Heitz, J.; Heiss, A.; Park, D.; Adamova, H.; Baumgartner, W. *ACS Appl. Nano Mater.* **2020**, *3*, 3395–3401.  
[doi.org/10.1021/acsanm.0c00130](https://doi.org/10.1021/acsanm.0c00130)
